# Supplementary material for: The role of Ag+, Ca2+, Pb2+ and Al3+ adions in the SERS turn-on effect of anionic analytes
Source: publisher site journal article supplement (doi:10.3762/bjnano.10.224), 2019-11-27
Supplement: Additional file 1 [file 2190-4286-10-224-S1.pdf]

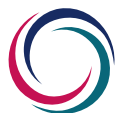

## Supporting Information

for

### **The role of $\text{Ag}^+$ , $\text{Ca}^{2+}$ , $\text{Pb}^{2+}$ and $\text{Al}^{3+}$ adions in the SERS turn-on effect of anionic analytes**

Stefania D. Iancu, Andrei Stefancu, Vlad Moisoiu, Loredana F. Leopold  
and Nicolae Leopold

*Beilstein J. Nanotechnol.* **2019**, *10*, 2338–2345. doi:10.3762/bjnano.10.224

## Additional experimental data

## **Content**

- Additional SERS enhancement of citrate at pH 4 due to  $\text{Al}^{3+}$  adions
- UV-vis extinction spectra of the colloidal solutions
- Raman and SERS spectra of the organic acids
- SERS spectra of salicylic acid in the 6–9 pH range
- Additional evidence for the role of adions in the SERS turn-on effect

### Additional SERS enhancement of citrate at pH 4 due to $\text{Al}^{3+}$ adions

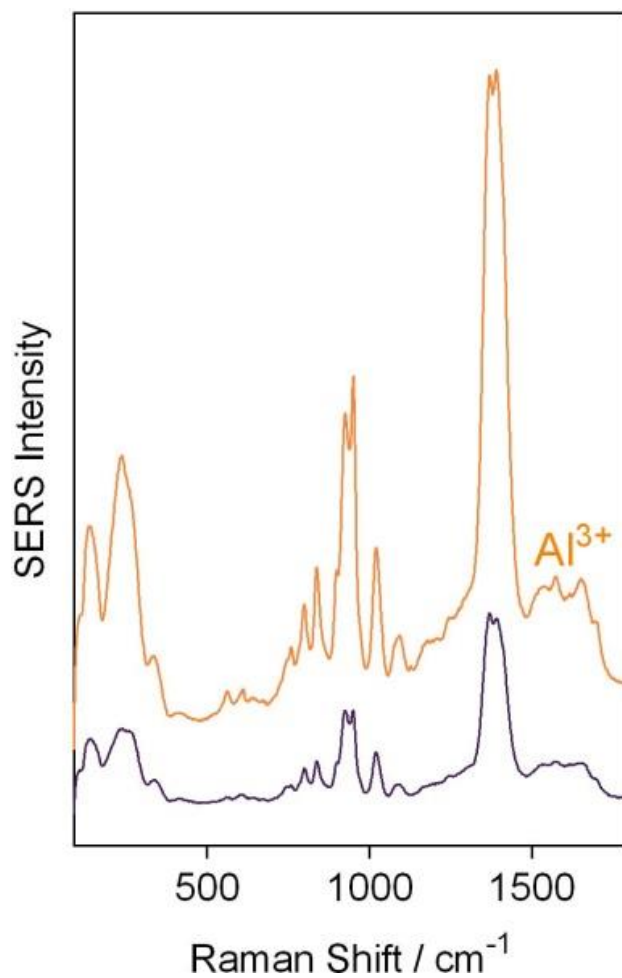

**Figure S1.** Additional intensity enhancement of the SERS spectrum of citrate at pH 4 in the presence of  $\text{Al}^{3+}$  adions. From bottom to top: SERS spectrum of citrate obtained from cit-AgNPs at pH 4 (pH lowering by addition of  $\text{HNO}_3$ ) and SERS spectrum of citrate obtained from cit-AgNPs at pH 4 supplemented with  $\text{Al}^{3+}$  50  $\mu\text{M}$  (added in form of sulphate salt  $\text{Al}_2(\text{SO}_4)_3$ ).

## UV-vis extinction spectra of the colloidal solutions

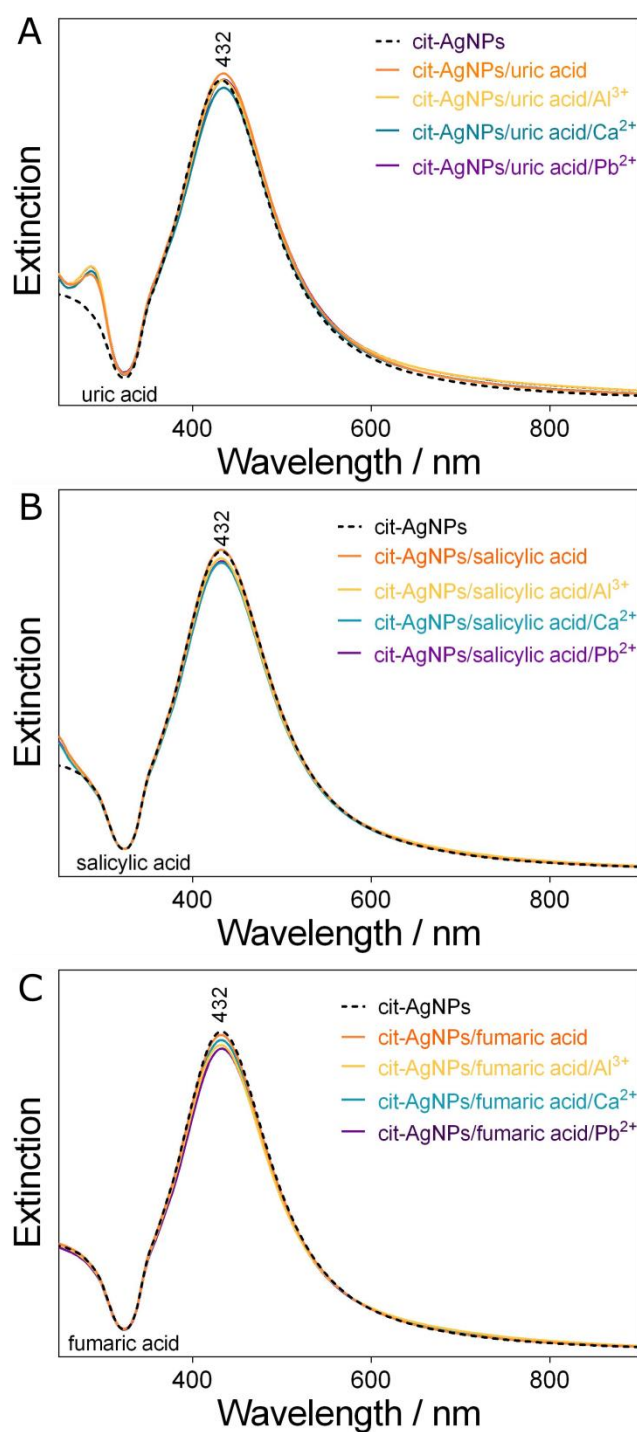

**Figure S2.** UV-vis extinction spectra of cit-AgNPs recorded at pH 6 and of the mixtures cit-AgNPs/uric acid (A), cit-AgNPs/salicylic acid (B), cit-AgNPs/fumaric acid (C) as well as the UV-vis spectra of the SERS activated cit-AgNPs/organic acid/cation mixtures as indicated in the figure. The final concentration of each organic acid in the solution was 50  $\mu\text{M}$  and that of the  $\text{Al}^{3+}$ ,  $\text{Ca}^{2+}$ ,  $\text{Pb}^{2+}$  cations 50  $\mu\text{M}$ .

## Raman and SERS spectra of the organic acids

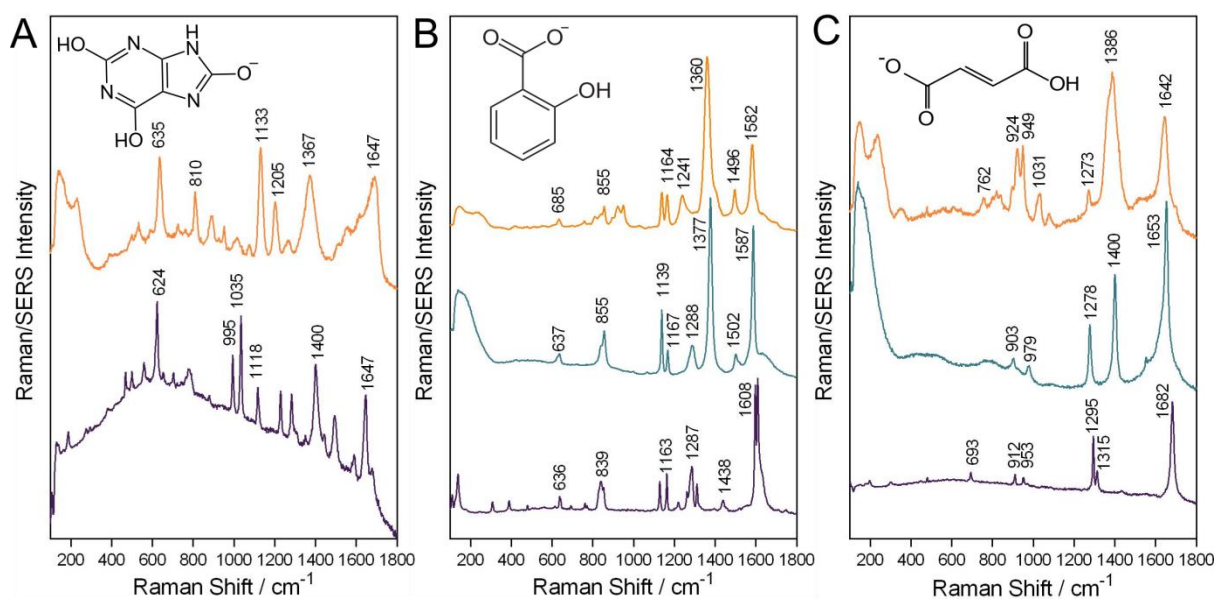

**Figure S3.** (A) Raman spectrum of powder uric acid and SERS spectrum of uric acid, (B) Raman spectrum of salicylic acid in powder form and in aqueous solution 0.1 M and SERS spectrum of salicylic acid, (C) Raman spectrum of fumaric acid in powder form and in aqueous solution 0.1 M and SERS spectrum of fumaric acid.

The SERS spectra were obtained after the addition of Al<sup>3+</sup> 50 μM to the cit-AgNPs. For Raman measurements aqueous solutions of salicylic and fumaric acid were obtained by solving the powders in ultrapure water with addition of NaOH in order to ensure a basic pH. All spectra were acquired with a 532 nm laser line.

### SERS spectra of salicylic acid in the 6–9 pH range

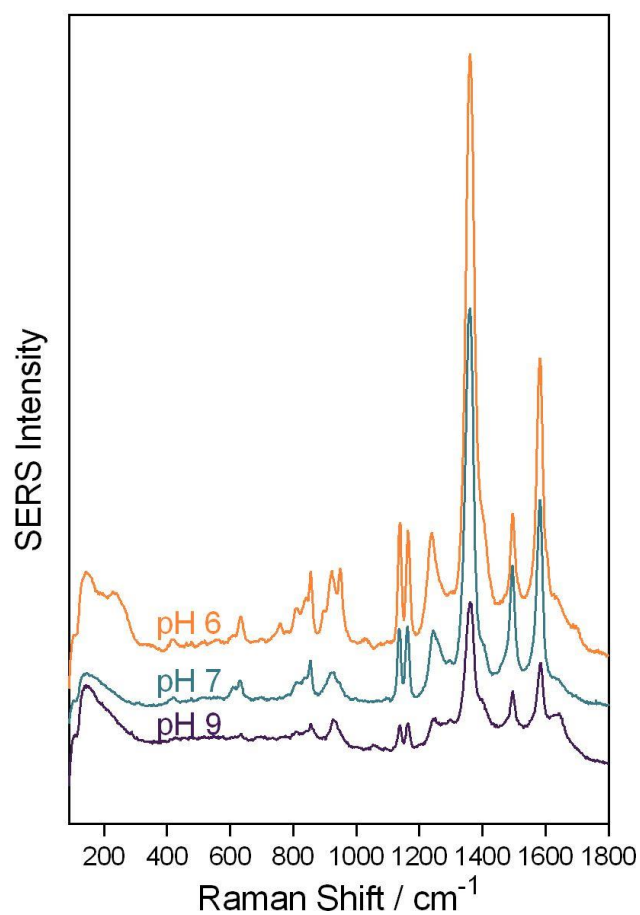

**Figure S4.** SERS spectra of 50  $\mu\text{M}$  salicylic acid obtained by using  $\text{Al}^{3+}$  50  $\mu\text{M}$  activated cit-AgNPs at pH 6, pH 7 and pH 9 as indicated in the figure.

## Additional evidence for the role of adions in the SERS turn-on effect

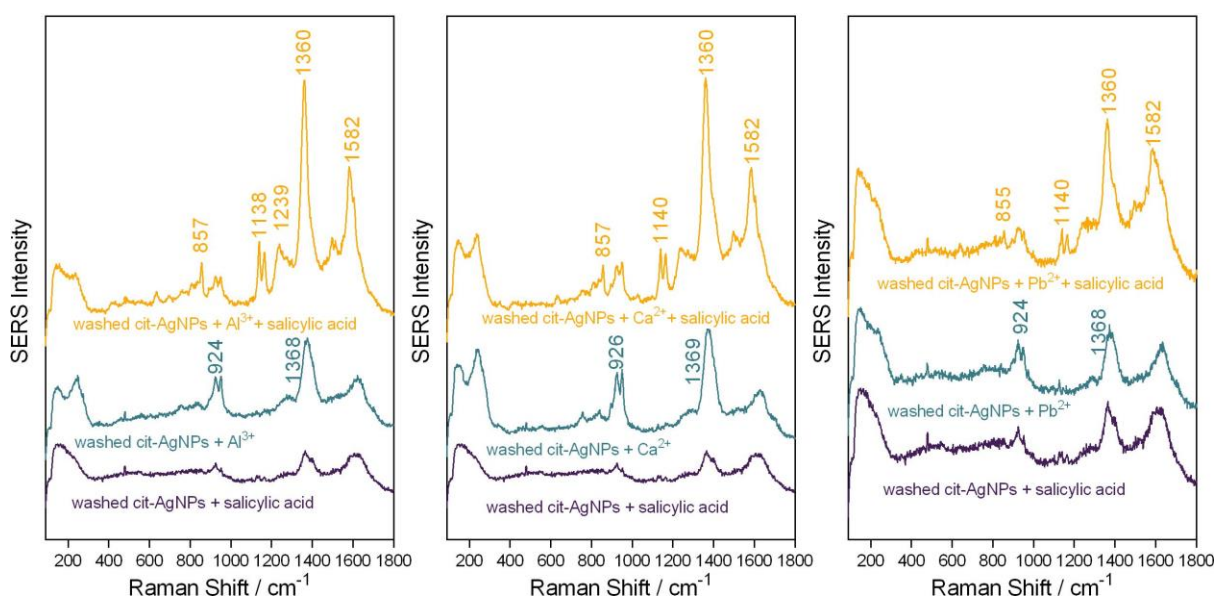

**Figure S5.** SERS spectra obtained from washed inactivated cit-AgNPs (violet spectra) containing salicylic acid 50  $\mu\text{M}$ , from activated cit-AgNPs with 50  $\mu\text{M}$   $\text{Al}^{3+}$ ,  $\text{Ca}^{2+}$  or  $\text{Pb}^{2+}$  (green spectra, from left to right) and from activated cit-AgNPs with 50  $\mu\text{M}$   $\text{Al}^{3+}$ ,  $\text{Ca}^{2+}$  or  $\text{Pb}^{2+}$  containing salicylic acid 50  $\mu\text{M}$  (yellow spectra, from left to right).

$\text{Ca}^{2+}$ ,  $\text{Pb}^{2+}$  or  $\text{Al}^{3+}$  activated cit-AgNPs were washed by centrifugation and resuspension in order to eliminate the excess of free, unadsorbed  $\text{Ca}^{2+}$ ,  $\text{Pb}^{2+}$  or  $\text{Al}^{3+}$  from the colloidal solution.

For this,  $\text{Ca}^{2+}$ ,  $\text{Pb}^{2+}$  or  $\text{Al}^{3+}$  (50  $\mu\text{M}$  final concentration) were added to 1 mL cit-AgNPs and the solution was vortexed for 1 minute to homogenize the solution and ensure the complete adsorption of the cations to the silver surface. Next, the solutions were centrifuged at 5800 g for 10 minutes, the supernatant was removed by pipetting and the cit-AgNPs were resuspended in 1 mL ultrapure water, so that the AgNPs concentration remained the same. By doing so, only the adsorbed cationic adions remain on the surface of the cit-AgNPs, whereas the free cations present in the solution were discarded.

As a reference, inactivated, as synthesized cit-AgNPs underwent the same washing process.

Salicylic acid (50  $\mu\text{M}$  final concentration) was added to both, activated and not activated washed colloidal solutions. The SERS spectra presented in Figure S5 show

that only the  $\text{Ca}^{2+}$ ,  $\text{Pb}^{2+}$  or  $\text{Al}^{3+}$ -activated cit-AgNPs enabled the obtaining of the SERS signal of salicylic acid, whereas by using the washed colloidal solution without any cations added resulted in a blank SERS signal of the colloidal solution. However, very weak intensity bands of citrate were observed in the SERS spectra of inactivated cit-AgNPs due to citrate residues remaining on the silver surface adsorbed to  $\text{Ag}^+$  active sites.

The citrate SERS spectrum is clearly observed when recording the SERS spectrum of the  $\text{Ca}^{2+}$ ,  $\text{Pb}^{2+}$  or  $\text{Al}^{3+}$  activated cit-AgNPs indicating that after the washing process, the adsorbed cationic adions remain on the surface of the cit-AgNPs together with a considerable amount of citrate capping agent.
